# Supplementary material for: Leuconostoc mesenteroides LVBH107 Antibacterial Activity against Porphyromonas gingivalis and Anti-Inflammatory Activity against P. gingivalis Lipopolysaccharide-Stimulated RAW 264.7 Cells
Source: MDPI journal article supplement (doi:10.3390/nu14132584), 2022-06-22
Supplement: s1 [file s1]

# Supplementary Materials

## 1. Preliminary screening of lactobacillus strain inhibiting *Porphyromonas gingivalis*

Oxford cup drilling method was used to screen probiotics for inhibiting *Porphyromonas gingivalis*. 200  $\mu$ L  $1 \times 10^7$  CFU/mL *Porphyromonas gingivalis* was evenly spread on Columbia blood agar plate, and 4 holes were drilled on the agar with Oxford cup. 100  $\mu$ L MRS liquid medium (as a control group) and lactobacillus with different concentrations ( $1 \times 10^8$  CFU/mL,  $1 \times 10^7$  CFU/mL,  $1 \times 10^6$  CFU/mL) were added to holes, respectively. After the liquid was absorbed by solid medium, the plate was inverted in a 37°C incubator for 48 h. Use vernier calipers to measure the diameter of the bacteriostatic zone under the concentrations of  $1 \times 10^8$  CFU/mL.

**Table S1.** Antibacterial circle diameter of lactobacillus to *Porphyromonas gingivalis*.

| Strain                                   | Inhibition zone (mm) | Strain                              | Inhibition zone (mm) |
|------------------------------------------|----------------------|-------------------------------------|----------------------|
| <i>Leuconostoc mesenteroides</i> LVBH101 | 14.7                 | <i>Lactobacillus sakei</i> MS101    | -                    |
| <i>Leuconostoc mesenteroides</i> LVBH107 | 28.9                 | <i>Lactobacillus sakei</i> MS107    | 16.9                 |
| <i>Leuconostoc mesenteroides</i> LVBH108 | 16.9                 | <i>Lactobacillus sakei</i> MS108    | 14.5                 |
| <i>Lactobacillus curvatus</i> LUA101     | 24.1                 | <i>Lactobacillus sakei</i> MS109    | -                    |
| <i>Lactobacillus curvatus</i> LUA102     | 14.3                 | <i>Lactobacillus sakei</i> MS201    | 16.8                 |
| <i>Lactobacillus curvatus</i> LUA103     | -                    | <i>Weissella cibaria</i> BSH507     | 17.4                 |
| <i>Lactobacillus curvatus</i> LUA104     | -                    | <i>Weissella cibaria</i> BSH509     | -                    |
| <i>Lactobacillus curvatus</i> LUA105     | 13.6                 | <i>Weissella cibaria</i> BSH510     | 19.4                 |
| <i>Lactobacillus curvatus</i> LUA206     | 18.9                 | <i>Weissella cibaria</i> CBN101     | 22.1                 |
| <i>Lactobacillus curvatus</i> LUA207     | 15.8                 | <i>Weissella cibaria</i> CBN102     | 20.5                 |
| <i>Pediococcus pentosaceus</i> BSF203    | -                    | <i>Weissella cibaria</i> CBN203     | 20.4                 |
| <i>Pediococcus pentosaceus</i> BSF204    | -                    | <i>Weissella cibaria</i> CBK101     | 19.8                 |
| <i>Pediococcus pentosaceus</i> BSF206    | 21.6                 | <i>Weissella cibaria</i> CBK102     | 16.4                 |
| <i>Pediococcus pentosaceus</i> BSF207    | -                    | <i>Weissella cibaria</i> CBK103     | 22.4                 |
| <i>Pediococcus pentosaceus</i> BSF208    | 16.5                 | <i>Weissella cibaria</i> CBK104     | 19.4                 |
| <i>Pediococcus pentosaceus</i> AC1-1     | 17.8                 | <i>Lactobacillus plantarum</i> K203 | 18.9                 |
| <i>Pediococcus pentosaceus</i> AC1-2     | 21.7                 | <i>Lactobacillus plantarum</i> K204 | -                    |
| <i>Pediococcus pentosaceus</i> AC2-1     | 16.4                 | <i>Lactobacillus plantarum</i> K205 | 17.8                 |
| <i>Pediococcus pentosaceus</i> AC2-2     | 22.1                 | <i>Lactobacillus plantarum</i> K206 | 18.9                 |
| <i>Pediococcus pentosaceus</i> AC2-3     | 22.9                 | <i>Lactobacillus plantarum</i> K207 | 14.8                 |
| <i>Lactobacillus sakei</i> BSA103        | 14.1                 | <i>Lactobacillus plantarum</i> K208 | 19.0                 |
| <i>Lactobacillus sakei</i> BSA206        | 20.9                 | <i>Lactobacillus plantarum</i> H102 | -                    |
| <i>Lactobacillus sakei</i> MS103         | 16.8                 | <i>Lactobacillus plantarum</i> H103 | -                    |
| <i>Lactobacillus sakei</i> MS104         | 23.7                 | <i>Lactobacillus plantarum</i> H104 | 20.9                 |
| <i>Lactobacillus sakei</i> MS105         | 16.5                 | <i>Lactobacillus plantarum</i> H105 | 16.9                 |

## 2. Relevant experimental data and *p* values

**Table S2.** Effect of *L. mesenteroides* LVBH107 on the cell viability of RAW264.7 cells.

| Group            | mean $\pm$ standard deviation | <i>p</i> 1 | <i>p</i> 2 | <i>p</i> 3 | <i>p</i> 4 |
|------------------|-------------------------------|------------|------------|------------|------------|
| Control          | 100.00 $\pm$ 7.32             |            |            |            |            |
| 7 Log-L LVBH107  | 126.50 $\pm$ 16.34            | 0.011      | 0.288      |            |            |
| 7 Log-HK LVBH107 | 116.50 $\pm$ 10.16            | 0.090      | 0.288      |            |            |
| 8 Log-L LVBH107  | 116.74 $\pm$ 10.07            | 0.086      |            | 0.173      |            |
| 8 Log-HK LVBH107 | 103.71 $\pm$ 13.14            | 0.689      |            | 0.173      |            |
| 9 Log-L LVBH107  | 87.08 $\pm$ 13.39             | 0.176      |            |            | 0.220      |
| 9 Log-HK LVBH107 | 75.44 $\pm$ 6.26              | 0.017      |            |            | 0.220      |

*p*1 is the *p* value compared with the control group, *p*2 is the *p* value compared with 7-L LVBH107 or 7-HK LVBH107 group, *p*3 is the *p* value compared with 8-L LVBH107 or 8-HK LVBH107 group, *p*4 is the *p* value compared with 9-L LVBH107 or 9-HK LVBH107 group.

**Table S3.** Effect of *L. mesenteroides* LVBH107 on TNF- $\alpha$  in RAW264.7 cells.

| Group            | mean $\pm$ standard deviation | <i>p</i> 1 | <i>p</i> 2 | <i>p</i> 3 |
|------------------|-------------------------------|------------|------------|------------|
| Control          | 126.89 $\pm$ 11.64            | 0.000      |            |            |
| Model            | 962.53 $\pm$ 64.23            |            |            |            |
| 7 Log-L LVBH107  | 565.88 $\pm$ 76.67            | 0.000      | 0.220      |            |
| 7 Log-HK LVBH107 | 629.24 $\pm$ 49.35            | 0.000      | 0.220      |            |
| 8 Log-L LVBH107  | 735.07 $\pm$ 36.64            | 0.001      |            | 0.595      |
| 8 Log-HK LVBH107 | 761.81 $\pm$ 87.46            | 0.001      |            | 0.595      |

*p*1 is the *p* value compared with the control group, *p*2 is the *p* value compared with 7-L LVBH107 or 7-HK LVBH107 group, *p*3 is the *p* value compared with 8-L LVBH107 or 8-HK LVBH107 group.

**Table S4.** Effect of *L. mesenteroides* LVBH107 on IL-6 in RAW264.7 cells.

| Group            | mean $\pm$ standard deviation | <i>p</i> 1 | <i>p</i> 2 | <i>p</i> 3 |
|------------------|-------------------------------|------------|------------|------------|
| Control          | 11.35 $\pm$ 3.21              | 0.000      |            |            |
| Model            | 298.89 $\pm$ 13.43            |            |            |            |
| 7 Log-L LVBH107  | 176.38 $\pm$ 18.18            | 0.000      | 0.000      |            |
| 7 Log-HK LVBH107 | 241.48 $\pm$ 19.13            | 0.010      | 0.000      |            |
| 8 Log-L LVBH107  | 196.18 $\pm$ 20.67            | 0.000      |            | 0.000      |
| 8 Log-HK LVBH107 | 287.9 $\pm$ 18.40             | 0.433      |            | 0.000      |

*p*1 is the *p* value compared with the control group, *p*2 is the *p* value compared with 7-L LVBH107 or 7-HK LVBH107 group, *p*3 is the *p* value compared with 8-L LVBH107 or 8-HK LVBH107 group.

**Table S5.** Effect of *L. mesenteroides* LVBH107 on IL-1 $\beta$  in RAW264.7 cells.

| Group            | mean $\pm$ standard deviation | <i>p</i> 1 | <i>p</i> 2 | <i>p</i> 3 |
|------------------|-------------------------------|------------|------------|------------|
| Control          | 9.06 $\pm$ 1.95               | 0.000      |            |            |
| Model            | 130.64 $\pm$ 10.61            |            |            |            |
| 7 Log-L LVBH107  | 79.4 $\pm$ 8.67               | 0.000      | 0.019      |            |
| 7 Log-HK LVBH107 | 100.22 $\pm$ 9.58             | 0.002      | 0.019      |            |
| 8 Log-L LVBH107  | 92.75 $\pm$ 7.26              | 0.000      |            | 0.003      |
| 8 Log-HK LVBH107 | 120.88 $\pm$ 14.01            | 0.228      |            | 0.003      |

*p*1 is the *p* value compared with the control group, *p*2 is the *p* value compared with 7-L LVBH107 or 7-HK LVBH107 group, *p*3 is the *p* value compared with 8-L LVBH107 or 8-HK LVBH107 group.

**Table S6.** Effect of *L. mesenteroides* LVBH107 on NO in RAW264.7 cells.

| Group            | mean $\pm$ standard deviation | <i>p</i> 1 | <i>p</i> 2 | <i>p</i> 3 |
|------------------|-------------------------------|------------|------------|------------|
| Control          | 18.77 $\pm$ 2.25              | 0.000      |            |            |
| Model            | 63.87 $\pm$ 4.26              |            |            |            |
| 7 Log-L LVBH107  | 46.22 $\pm$ 3.29              | 0.000      | 0.003      |            |
| 7 Log-HK LVBH107 | 58.21 $\pm$ 5.33              | 0.111      | 0.003      |            |
| 8 Log-L LVBH107  | 52.28 $\pm$ 4.67              | 0.040      |            | 0.030      |
| 8 Log-HK LVBH107 | 60.37 $\pm$ 3.60              | 0.309      |            | 0.030      |

*p*1 is the *p* value compared with the control group, *p*2 is the *p* value compared with 7-L LVBH107 or 7-HK LVBH107 group, *p*3 is the *p* value compared with 8-L LVBH107 or 8-HK LVBH107 group.

**Table S7.** Effect of *L. mesenteroides* LVBH107 on PGE2 in RAW264.7 cells.

| Group            | mean $\pm$ standard deviation | <i>p</i> 1 | <i>p</i> 2 | <i>p</i> 3 |
|------------------|-------------------------------|------------|------------|------------|
| Control          | 19.63 $\pm$ 1.00              | 0.000      |            |            |
| Model            | 42.39 $\pm$ 3.43              |            |            |            |
| 7 Log-L LVBH107  | 36.24 $\pm$ 2.88              | 0.070      | 0.810      |            |
| 7 Log-HK LVBH107 | 39.82 $\pm$ 1.15              | 0.196      | 0.810      |            |
| 8 Log-L LVBH107  | 38.6 $\pm$ 1.96               | 0.067      |            | 0.111      |
| 8 Log-HK LVBH107 | 41.82 $\pm$ 2.35              | 0.769      |            | 0.111      |

*p*1 is the *p* value compared with the control group, *p*2 is the *p* value compared with 7-L LVBH107 or 7-HK LVBH107 group, *p*3 is the *p* value compared with 8-L LVBH107 or 8-HK LVBH107 group.

**Table S8.** Effect of *L. mesenteroides* LVBH107 on TNF- $\alpha$  mRNA expression in RAW264.7 cells.

| Group            | mean $\pm$ standard deviation | <i>p</i> 1 | <i>p</i> 2 | <i>p</i> 3 |
|------------------|-------------------------------|------------|------------|------------|
| Control          | 0.04 $\pm$ 0.01               | 0.000      |            |            |
| Model            | 1.00 $\pm$ 0.10               |            |            |            |
| 7 Log-L LVBH107  | 0.64 $\pm$ 0.11               | 0.000      | 0.001      |            |
| 7 Log-HK LVBH107 | 0.93 $\pm$ 0.09               | 0.264      | 0.001      |            |
| 8 Log-L LVBH107  | 0.89 $\pm$ 0.08               | 0.101      |            | 0.240      |
| 8 Log-HK LVBH107 | 0.97 $\pm$ 0.09               | 0.601      |            | 0.240      |

*p*1 is the *p* value compared with the control group, *p*2 is the *p* value compared with 7-L LVBH107 or 7-HK LVBH107 group, *p*3 is the *p* value compared with 8-L LVBH107 or 8-HK LVBH107 group.

**Table S9.** Effect of *L. mesenteroides* LVBH107 on IL-6 mRNA expression in RAW264.7 cells.

| Group            | mean $\pm$ standard deviation | <i>p</i> 1 | <i>p</i> 2 | <i>p</i> 3 |
|------------------|-------------------------------|------------|------------|------------|
| Control          | 0.09 $\pm$ 0.01               | 0.000      |            |            |
| Model            | 1.00 $\pm$ 0.14               |            |            |            |
| 7 Log-L LVBH107  | 0.54 $\pm$ 0.11               | 0.000      | 0.010      |            |
| 7 Log-HK LVBH107 | 0.85 $\pm$ 0.09               | 0.048      | 0.010      |            |
| 8 Log-L LVBH107  | 0.77 $\pm$ 0.09               | 0.060      |            | 0.015      |
| 8 Log-HK LVBH107 | 0.97 $\pm$ 0.13               | 0.633      |            | 0.015      |

*p*1 is the *p* value compared with the control group, *p*2 is the *p* value compared with 7-L LVBH107 or 7-HK LVBH107 group, *p*3 is the *p* value compared with 8-L LVBH107 or 8-HK LVBH107 group.

**Table S10.** Effect of *L. mesenteroides* LVBH107 on IL-1 $\beta$  mRNA expression in RAW264.7 cells.

| Group            | mean $\pm$ standard deviation | <i>p</i> 1 | <i>p</i> 2 | <i>p</i> 3 |
|------------------|-------------------------------|------------|------------|------------|
| Control          | 0.03 $\pm$ 0.01               | 0.000      |            |            |
| Model            | 1.00 $\pm$ 0.13               |            |            |            |
| 7 Log-L LVBH107  | 0.86 $\pm$ 0.08               | 0.028      | 0.048      |            |
| 7 Log-HK LVBH107 | 0.98 $\pm$ 0.11               | 0.775      | 0.048      |            |
| 8 Log-L LVBH107  | 0.93 $\pm$ 0.05               | 0.251      |            | 0.358      |
| 8 Log-HK LVBH107 | 41.82 $\pm$ 2.35              | 0.769      |            | 0.358      |

*p*1 is the *p* value compared with the control group, *p*2 is the *p* value compared with 7-L LVBH107 or 7-HK LVBH107 group, *p*3 is the *p* value compared with 8-L LVBH107 or 8-HK LVBH107 group.

**Table S11.** Effect of *L. mesenteroides* LVBH107 on COX-2 mRNA expression in RAW264.7 cells.

| Group            | mean $\pm$ standard deviation | <i>p</i> 1 | <i>p</i> 2 | <i>p</i> 3 |
|------------------|-------------------------------|------------|------------|------------|
| Control          | 0.06 $\pm$ 0.01               | 0.000      |            |            |
| Model            | 1.00 $\pm$ 0.07               |            |            |            |
| 7 Log-L LVBH107  | 0.63 $\pm$ 0.04               | 0.000      | 0.000      |            |
| 7 Log-HK LVBH107 | 0.93 $\pm$ 0.08               | 0.097      | 0.000      |            |
| 8 Log-L LVBH107  | 0.85 $\pm$ 0.06               | 0.020      |            | 0.013      |
| 8 Log-HK LVBH107 | 0.96 $\pm$ 0.05               | 0.364      |            | 0.013      |

*p*1 is the *p* value compared with the control group, *p*2 is the *p* value compared with 7-L LVBH107 or 7-HK LVBH107 group, *p*3 is the *p* value compared with 8-L LVBH107 or 8-HK LVBH107 group.

**Table S12.** Effect of *L. mesenteroides* LVBH107 on *i*NOS mRNA expression in RAW264.7 cells.

| Group            | mean $\pm$ standard deviation | <i>p</i> 1 | <i>p</i> 2 | <i>p</i> 3 |
|------------------|-------------------------------|------------|------------|------------|
| Control          | 0.11 $\pm$ 0.03               | 0.000      |            |            |
| Model            | 1.00 $\pm$ 0.07               |            |            |            |
| 7 Log-L LVBH107  | 0.79 $\pm$ 0.06               | 0.001      | 0.010      |            |
| 7 Log-HK LVBH107 | 0.93 $\pm$ 0.08               | 0.146      | 0.010      |            |
| 8 Log-L LVBH107  | 0.86 $\pm$ 0.07               | 0.010      |            | 0.014      |
| 8 Log-HK LVBH107 | 0.99 $\pm$ 0.051              | 0.855      |            | 0.014      |

*p*1 is the *p* value compared with the control group, *p*2 is the *p* value compared with 7-L LVBH107 or 7-HK LVBH107 group, *p*3 is the *p* value compared with 8-L LVBH107 or 8-HK LVBH107 group.
